# Supplementary material
Source: PubMed Central journal article supplement (PMC6459603)
Supplement: NIHMS1503365-supplement-1.pdf [file NIHMS1503365-supplement-1.pdf]

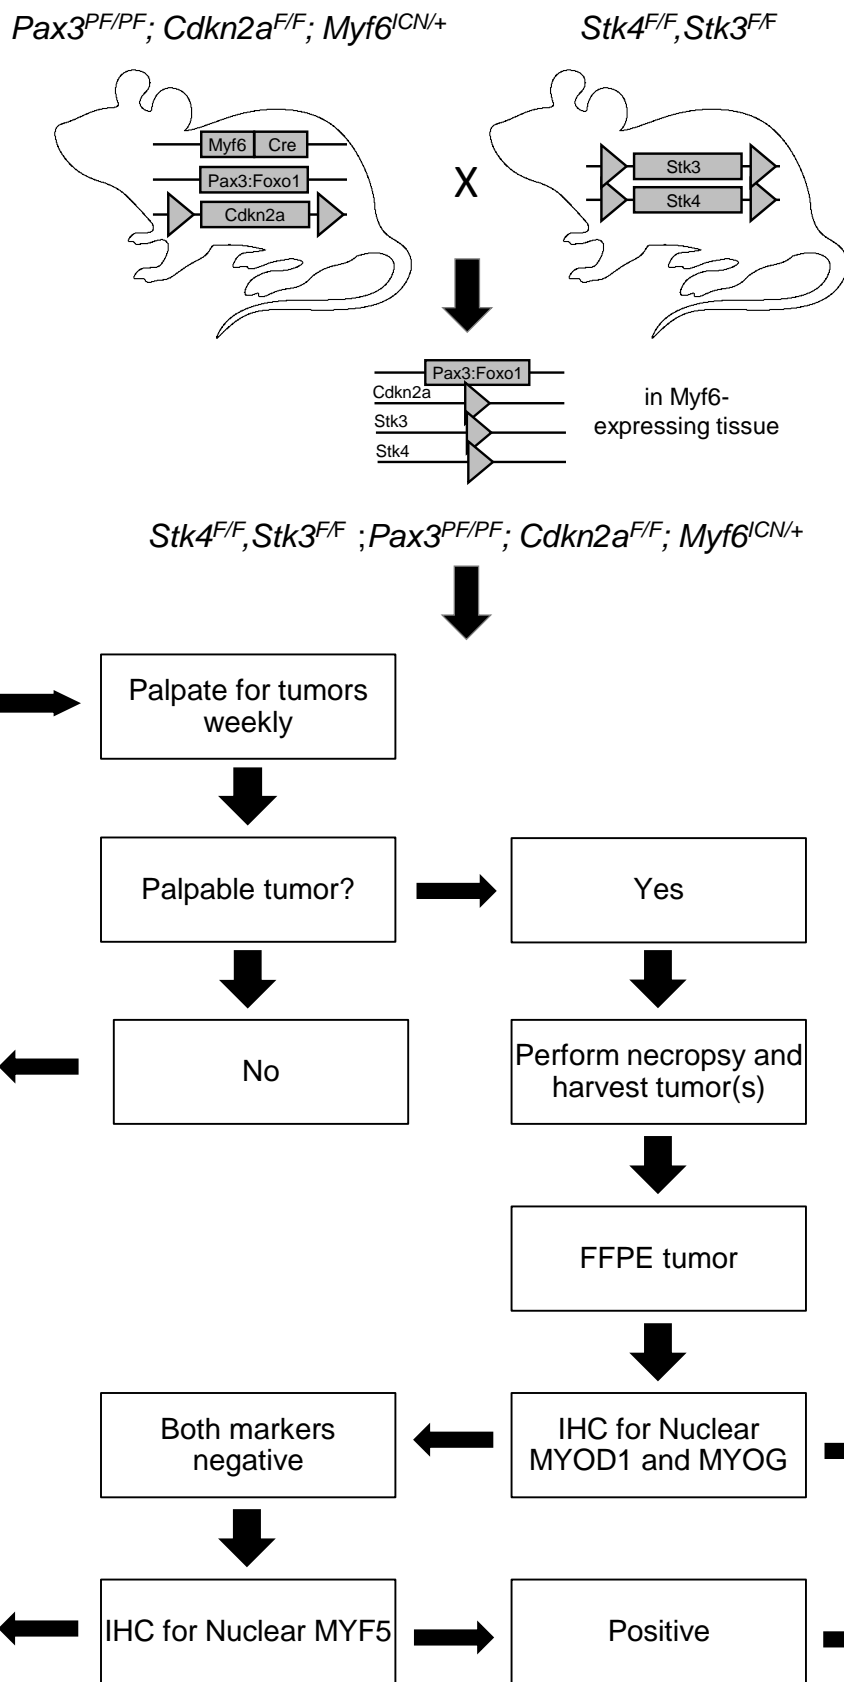

**Supplementary Figure 1. Use of the Cre-Lox system to create and diagnose a genetically engineered mouse model (GEMM) of Pax3:Foxo1-positive aRMS with conditional deletion of the MST1 (*Stk4*) and MST2 (*Stk3*) alleles.** The *Pax3<sup>PF/PF</sup>; Cdkn2a<sup>F/F</sup>; Myf6<sup>ICN/+</sup>* aRMS GEMM was re-derived from founder mice according to the original description of this model (Keller et al, 2004). The re-derived GEMM was then crossed with mice harboring floxed *Stk4<sup>F/F</sup>; Stk3<sup>F/F</sup>* alleles. Expression of *Cre* results in expression of *Pax3:Foxo1* but loss of *Cdkn2a*, *Stk3*, and *Stk4* in cells and tissues expressing *Myf6*. Mice were obtained from sources described in Materials and Methods. Triangles indicate LoxP sites. A series of parameters were established for inclusion and analysis of tumors arising from the MST<sup>WT</sup> and MST<sup>Null</sup> aRMS model cohorts for further analysis based on palpability on physical examination, age of animal, cellular morphology, and histologic markers.
