# Supplementary material
Source: PubMed Central journal article supplement (PMC6459603)
Supplement: NIHMS1503365-supplement-2.pdf [file NIHMS1503365-supplement-2.pdf]

A

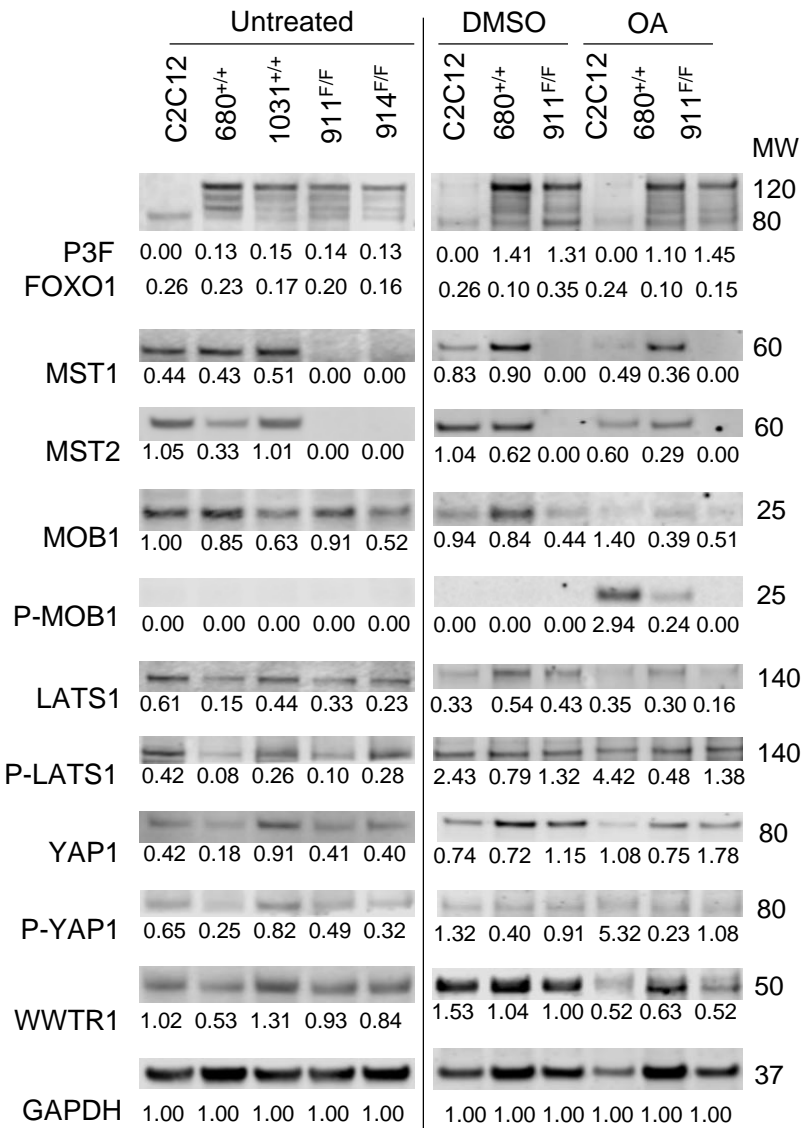

B

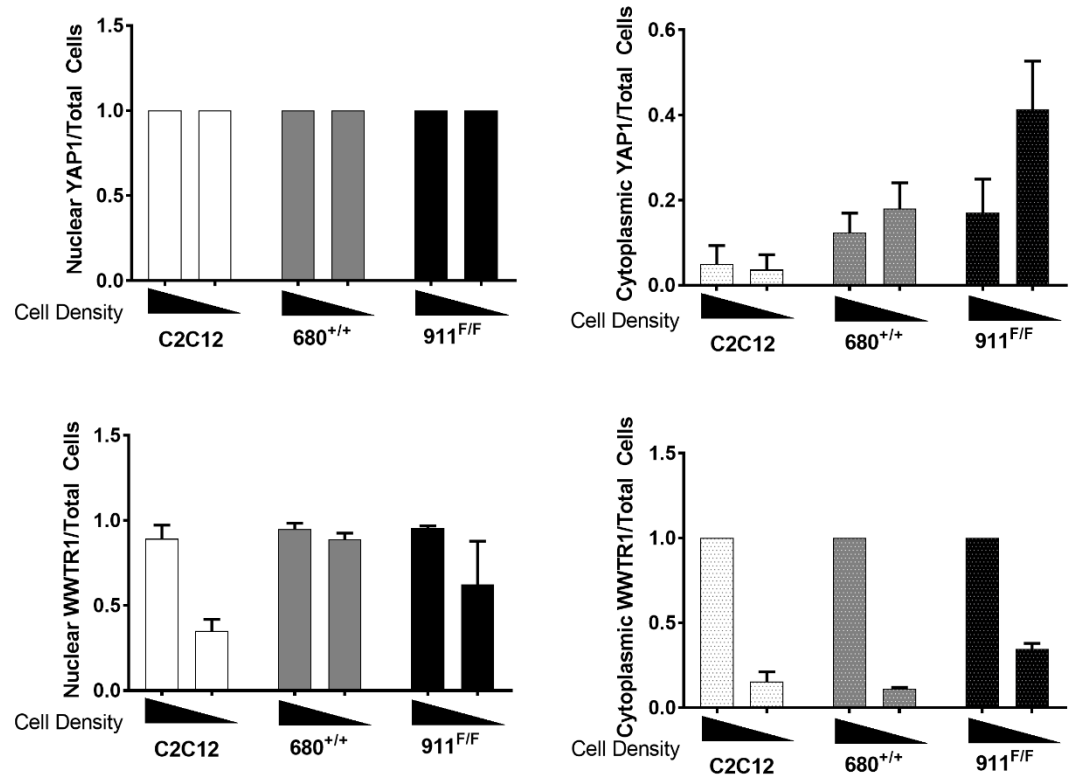

C

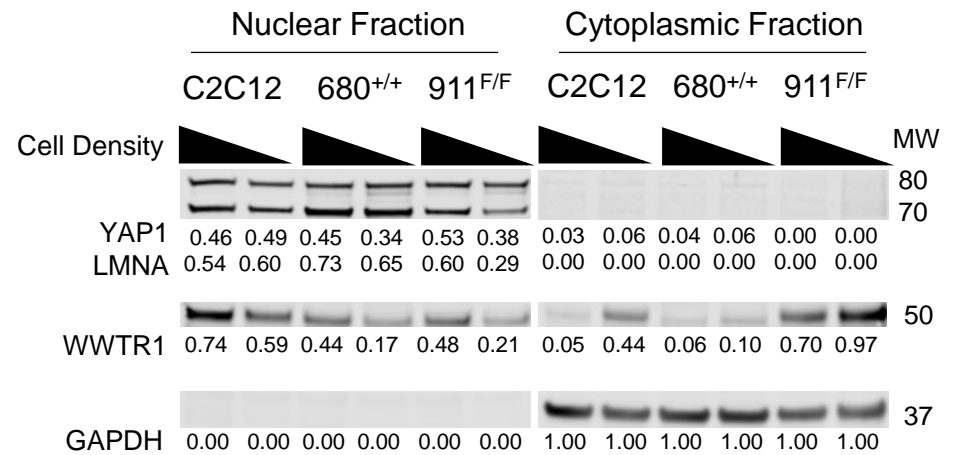

**Supplementary Figure 2. Quantification of immunoblots and immunofluorescence data.** (A) Immunoblots (from Figure 2A) of PAX3-FOXO1, FOXO1, and proteins in the Hippo pathway were quantified by analyzing densitometry of bands relative to background of each lane using ImageJ software and normalized to loading controls for each sample. (B) Immunofluorescence studies (from Figure 3B) of YAP1 and WWTR1 localization were quantified as the proportion of nuclear (left panels) or cytoplasmic (right panels) localized protein relative to total cell number per field at 200x magnification. Experiments were conducted in triplicate. (C) Immunoblots (from Figure 3C) of fractionated lysates of tumor-derived cell lines were quantified by analyzing densitometry of bands relative to background of each lane using ImageJ software and normalized to loading controls for each sample.
