# Supplementary material
Source: PubMed Central journal article supplement (PMC6459603)
Supplement: NIHMS1503365-supplement-4.pdf [file NIHMS1503365-supplement-4.pdf]

| Mouse Number | Time to Tumor (days) | Site of Tumor | Genotype                                                                                                  |
|--------------|----------------------|---------------|-----------------------------------------------------------------------------------------------------------|
| 680*         | 116                  | Body wall     | Pax3 <sup>PF/PF</sup> Cdkn2a <sup>F/F</sup> Myf6 <sup>ICN/+</sup>                                         |
| 663          | 157                  | Limb          | Stk3 <sup>F/F</sup> Stk4 <sup>F/F</sup> Pax3 <sup>PF/PF</sup> Cdkn2a <sup>F/F</sup> Myf6 <sup>ICN/+</sup> |
| 692          | 114                  | Neck          | Stk3 <sup>F/F</sup> Stk4 <sup>F/F</sup> Pax3 <sup>PF/PF</sup> Cdkn2a <sup>F/F</sup> Myf6 <sup>ICN/+</sup> |
| 731          | 92                   | Shoulder      | Stk3 <sup>F/F</sup> Stk4 <sup>F/F</sup> Pax3 <sup>PF/PF</sup> Cdkn2a <sup>F/F</sup> Myf6 <sup>ICN/+</sup> |
| 911*         | 70                   | Tongue        | Stk3 <sup>F/F</sup> Stk4 <sup>F/F</sup> Pax3 <sup>PF/PF</sup> Cdkn2a <sup>F/F</sup> Myf6 <sup>ICN/+</sup> |
| 914*         | 99                   | Tongue        | Stk3 <sup>F/F</sup> Stk4 <sup>F/F</sup> Pax3 <sup>PF/PF</sup> Cdkn2a <sup>F/F</sup> Myf6 <sup>ICN/+</sup> |
| 1011         | 104                  | Tongue        | Stk3 <sup>+/+</sup> Stk4 <sup>F/+</sup> Pax3 <sup>PF/PF</sup> Cdkn2a <sup>F/F</sup> Myf6 <sup>ICN/+</sup> |
| 1031*        | 133                  | Neck          | Pax3 <sup>PF/PF</sup> Cdkn2a <sup>F/F</sup> Myf6 <sup>ICN/+</sup>                                         |

\* Cell lines used for further validation in the manuscript.

**Supplementary Table 1. Cell lines generated from GEMM tumors.** To further interrogate the signaling and in vitro phenotypes of MST<sup>WT</sup> and MST<sup>Null</sup> aRMS tumorigenesis, cell lines were generated from tumors.
