# Supplementary material
Source: PubMed Central journal article supplement (PMC6459603)
Supplement: NIHMS1503365-supplement-5.pdf [file NIHMS1503365-supplement-5.pdf]

| <b>Antibody</b> | <b>Clone</b> | <b>Manufacturer</b> | <b>ID Number</b> | <b>Dilution</b> | <b>Application Herein</b> |
|-----------------|--------------|---------------------|------------------|-----------------|---------------------------|
| Anti-MyoD1      | 5.8A         | Dako                | M3512            | 1:200           | Immunohistochemistry      |
| Anti-Myogenin   | F5D          | Dako                | M3559            | 1:200           | Immunohistochemistry      |
| GFP             | D5.1         | Cell Signaling      | 2956             | 1:200           | Immunohistochemistry      |
| YAP             | Polyclonal   | Cell Signaling      | 4912             | 1:200           | Immunohistochemistry      |
| Anti-Myf5       | EPR4899      | Abcam               | Ab125078         | 1:200           | Immunohistochemistry      |
| MF20            | U/K mAb      | DSHB                | MF 20            | 1:5             | Immunocytochemistry       |
| MST1            | Polyclonal   | Cell Signaling      | 3682             | 1:1,000         | Immunoblotting            |
| Anti-STK3       | EP1466Y      | Abcam               | Ab52641          | 1:1,000         | Immunoblotting            |
| p-MST1/2        | Polyclonal   | Cell Signaling      | 3681             | 1:1,000         | Immunoblotting            |
| Mob1            | Polyclonal   | Cell Signaling      | 3863             | 1:1,000         | Immunoblotting            |
| p-Mob1          | D2F10        | Cell Signaling      | 8699             | 1:1,000         | Immunoblotting            |
| Lats1           | C66B5        | Cell Signaling      | 3477             | 1:1,000         | Immunoblotting            |
| p-Lats1         | Polyclonal   | Cell Signaling      | 9157             | 1:1,000         | Immunoblotting            |
| YAP             | Polyclonal   | Cell Signaling      | 4912             | 1:1,000         | Immunoblotting            |
| p-YAP           | Polyclonal   | Cell Signaling      | 4911             | 1:1,000         | Immunoblotting            |
| Taz             | Polyclonal   | Cell Signaling      | 4883             | 1:1,000         | Immunoblotting            |
| Foxo1           | C29H4        | Cell Signaling      | 2880             | 1:1,000         | Immunoblotting            |
| Gapdh           | 6C5          | Santa Cruz          | sc-32233         | 1:10,000        | Immunoblotting            |
| LaminaA         | Polyclonal   | Sigma               | L1293            | 1:10,000        | Immunoblotting            |
| YAP             | Polyclonal   | Cell Signaling      | 4912             | 1:200           | Immunofluorescence        |
| Anti-WWTR1      | Polyclonal   | Sigma               | HPA007415        | 1:200           | Immunofluorescence        |

**Supplementary Table 2. Antibodies used in tumor and cell line characterization.**
