# Supplementary material
Source: PubMed Central journal article supplement (PMC6459603)
Supplement: NIHMS1503365-supplement-6.pdf [file NIHMS1503365-supplement-6.pdf]

| Genotype                                                                                                                                               | (N) | Animals That Developed Tumors | Confirmed RMS | Penetrance (%) |
|--------------------------------------------------------------------------------------------------------------------------------------------------------|-----|-------------------------------|---------------|----------------|
| <b>Experimental Lines</b>                                                                                                                              |     |                               |               |                |
| <i>Pax3</i> <sup>PF/PF</sup> ; <i>Cdkn2a</i> <sup>F/F</sup> ; <i>Myf6</i> <sup>ICN/any</sup>                                                           | 56  | 19                            | 12/15         | 27             |
| <i>Stk3</i> <sup>F/F</sup> ; <i>Stk4</i> <sup>F/F</sup> ; <i>Pax3</i> <sup>PF/PF</sup> ; <i>Cdkn2a</i> <sup>F/F</sup> ; <i>Myf6</i> <sup>ICN/any</sup> | 37  | 35                            | 13/14         | 88             |
| <b>MST<sup>WT</sup> Control Lines</b>                                                                                                                  |     |                               |               |                |
| <i>Pax3</i> <sup>PF/PF</sup> ; <i>Cdkn2a</i> <sup>+/+</sup> ; <i>Myf6</i> <sup>ICN/any</sup>                                                           | 17  | 1                             | 0/1           | 0              |
| <i>Pax3</i> <sup>PF/PF</sup> ; <i>Cdkn2a</i> <sup>F/+</sup> ; <i>Myf6</i> <sup>ICN/any</sup>                                                           | 46  | 0                             | -             | 0              |
| <i>Pax3</i> <sup>PF/+</sup> ; <i>Cdkn2a</i> <sup>+/+</sup> ; <i>Myf6</i> <sup>ICN/any</sup>                                                            | 15  | 0                             | -             | 0              |
| <i>Pax3</i> <sup>PF/+</sup> ; <i>Cdkn2a</i> <sup>F/+</sup> ; <i>Myf6</i> <sup>ICN/any</sup>                                                            | 2   | 0                             | -             | 0              |
| <b>MST<sup>Null</sup> Control Lines</b>                                                                                                                |     |                               |               |                |
| <i>Stk3</i> <sup>F/F</sup> ; <i>Stk4</i> <sup>F/F</sup> ; <i>Pax7</i> <sup>CE/+</sup> (+IP Tamoxifen)                                                  | 8   | 0                             | -             | 0              |
| <i>Stk3</i> <sup>F/F</sup> ; <i>Stk4</i> <sup>F/F</sup> ; <i>Pax3</i> <sup>+/+</sup> ; <i>Cdkn2a</i> <sup>+/+</sup> ; <i>Myf6</i> <sup>ICN/any</sup>   | 27  | 1                             | 0/1           | 0              |
| <i>Stk3</i> <sup>F/F</sup> ; <i>Stk4</i> <sup>F/F</sup> ; <i>Pax3</i> <sup>PF/+</sup> ; <i>Cdkn2a</i> <sup>+/+</sup> ; <i>Myf6</i> <sup>ICN/any</sup>  | 8   | 0                             | -             | 0              |
| <i>Stk3</i> <sup>F/F</sup> ; <i>Stk4</i> <sup>F/F</sup> ; <i>Pax3</i> <sup>PF/PF</sup> ; <i>Cdkn2a</i> <sup>+/+</sup> ; <i>Myf6</i> <sup>ICN/any</sup> | 22  | 0                             | -             | 0              |
| <i>Stk3</i> <sup>F/F</sup> ; <i>Stk4</i> <sup>F/F</sup> ; <i>Pax3</i> <sup>PF/PF</sup> ; <i>Cdkn2a</i> <sup>F/+</sup> ; <i>Myf6</i> <sup>ICN/any</sup> | 26  | 0                             | -             | 0              |

**Supplementary Table 3. Experimental genotypes generated and tumor penetrance.** MST1/2-floxed (*Stk3*<sup>F/F</sup>; *Stk4*<sup>F/F</sup>) mice were crossed with an established MST<sup>WT</sup> aRMS GEMM based on conditional expression of Pax3:Foxo1 from the endogenous *Pax3* locus and conditional loss of *Cdkn2a* in *Myf6*-expressing cells. Red font indicates point of divergence from aRMS model genotype. Penetrance is calculated as (animals with tumors/total animals) x (confirmed RMS tumors/total analyzed tumors).
