# Supplementary material
Source: PubMed Central journal article supplement (PMC6459603)
Supplement: NIHMS1503365-supplement-7.pdf [file NIHMS1503365-supplement-7.pdf]

|                                                                                                                        | <b>MST<sup>WT</sup></b> | <b>MST<sup>Null</sup></b> |
|------------------------------------------------------------------------------------------------------------------------|-------------------------|---------------------------|
| Total number mice generated                                                                                            | 56                      | 37                        |
| Total number tumors arising                                                                                            | 19                      | 35                        |
| Tumors subject to IHC algorithm                                                                                        | 15                      | 14                        |
| Tumors diagnosed as aRMS                                                                                               | 12                      | 13                        |
| Proportion diagnosed as aRMS =<br>Tumors diagnosed as aRMS/Tumors subject to IHC algorithm                             | 0.80                    | 0.93                      |
| aRMS tumor penetrance =<br>(Total number tumors arising/Total number mice generated)<br>x Proportion diagnosed as aRMS | 0.27                    | 0.88                      |

**Supplementary Table 4. Calculation of aRMS tumor penetrance.** aRMS tumor penetrance in the MST<sup>WT</sup> and MST<sup>Null</sup> aRMS models was determined by taking into account the total number of mice generated per model, the total number of tumors arising in each model, and the proportion of tumors diagnosed as aRMS according to the algorithm described in **Supp. Fig.1**.
